# Supplementary material for: Natural Product Cordycepin (CD) Inhibition for NRP1/CD304 Expression and Possibly SARS-CoV-2 Susceptibility Prevention on Cancers
Source: MDPI journal article supplement (doi:10.3390/microorganisms11122953), 2023-12-10
Supplement: s1 [file s1]

Supplementary figures

## Supplementary figure

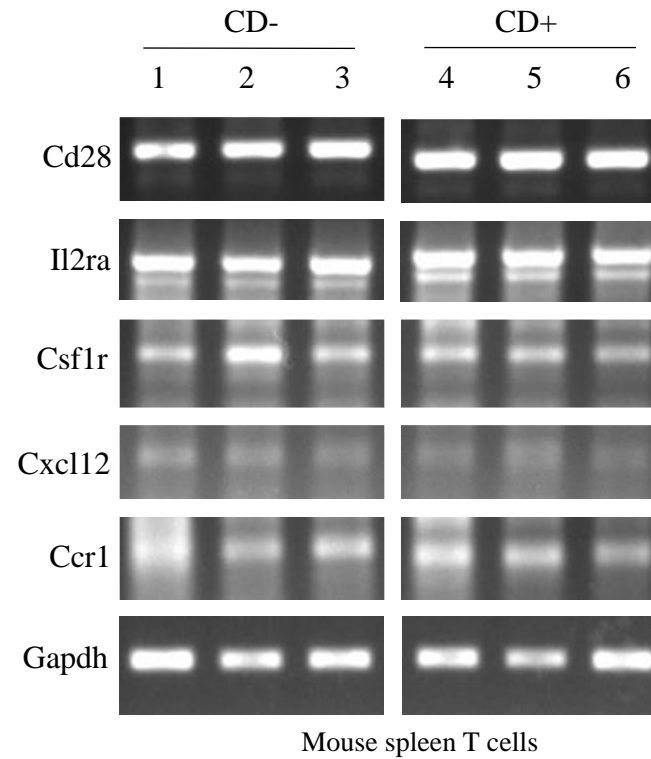

**Supplementary figure S1.** The mRNA expressions of *Cd28*, *Cxcl12*, *Csf1r*, *Kdr*, *Ccr1*, and *Il2ra* when treated with CD in mice.
